# Supplementary material for: Colloidosomes from poly(N-vinyl-2-pyrrolidone)-coated poly(N-isopropylacrylamide-co-acrylic acid) microgels via UV crosslinking
Source: Royal Society of Chemistry journal article supplement (doi:10.1039/c3ra47405d), 2014-01-01
Supplement: c3ra47405d.pdf [file c3ra47405d.pdf]

---

Supporting Information for  
Colloidosomes from Poly(N-vinyl-2-pyrrolidone)-coated Poly(N-iso  
propylacrylamide-co-acrylic acid) Microgels via UV Crosslinking

*Yi Gong, Ai Mei Zhu, Qiu Gen Zhang and Qing Lin Liu \**

Department of Chemical and Biochemical Engineering, College of Chemistry and Chemical  
Engineering, Xiamen University, Xiamen 361005, P.R. China.

**Figures**

Figure S1 FTIR of the samples prepared at different AAc contents.

Figure S2 Zeta potentials of the P(NIPAM-co-AAc) microgels and PVP in different pH  
solutions.

Figure S3 FTIR of different samples: P(NIPAM-co-AAc) microgels before PVP coating (a),  
P(NIPAM-co-AAc) microgels after PVP coating with AAc content of 10% (b) and 15% (c).

Figure S4 Relationship between the temperature and absorbance of the colloidosomes  
(1 mg/ml) in PBS (pH =7.4) solution.

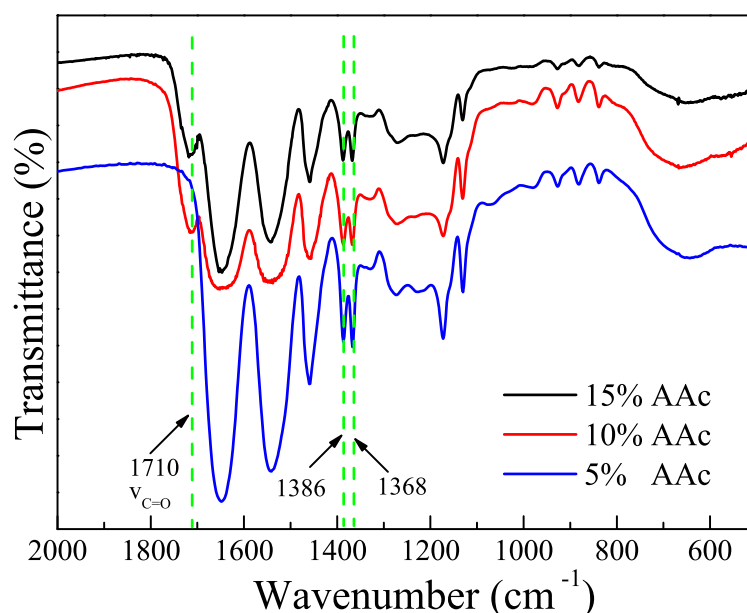

Figure S1 FTIR of the samples prepared at different AAc contents.

The peaks of isopropyl in FTIR spectra are strong specific double peaks around 1366 and

1386  $\text{cm}^{-1}$  which can be found in all the samples. The characteristic peak of C=O around 1710  $\text{cm}^{-1}$  can be detected only in the microgels prepared with 10% and 15% AAc contents.

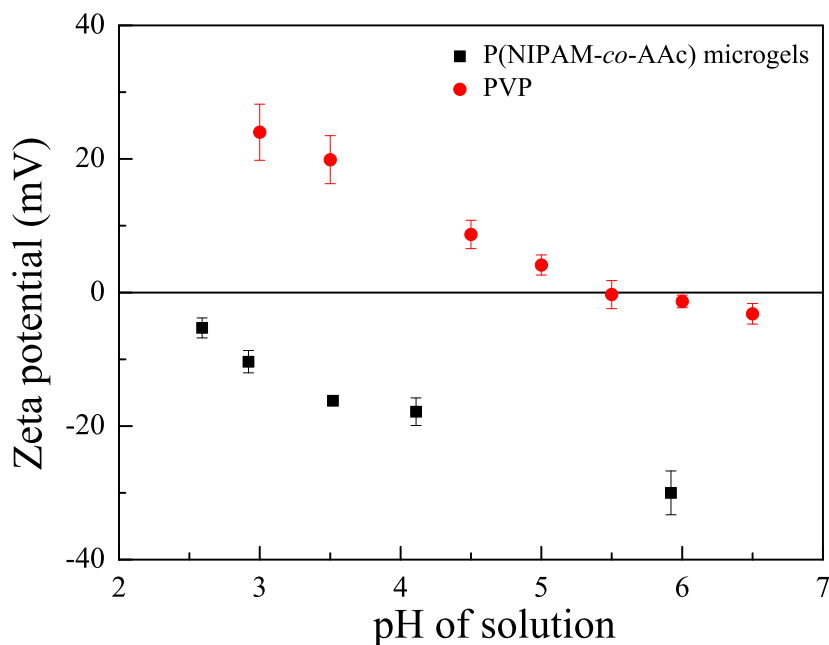

Figure S2 Zeta potentials of the P(NIPAM-co-AAc) microgels and PVP in different pH solutions.

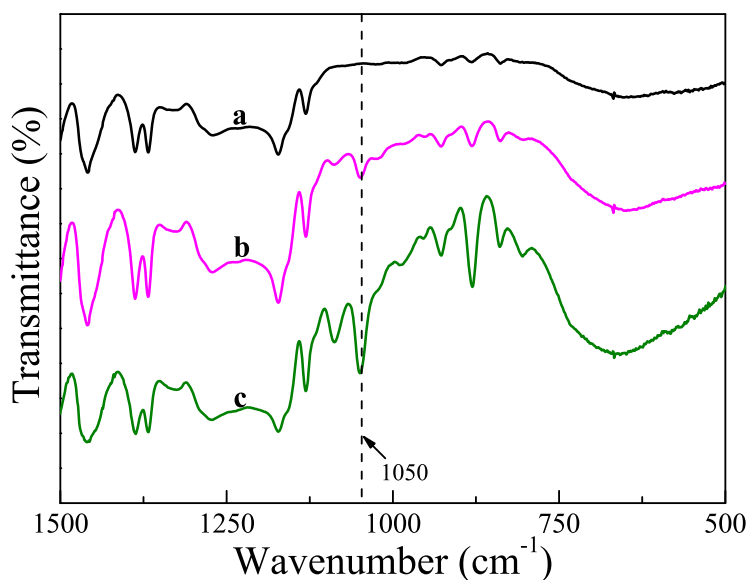

Figure S3 FTIR of different samples: (a) P(NIPAM-co-AAc) microgels before PVP coating, P(NIPAM-co-AAc) microgels after PVP coating with AAc content of (b) 10% and (c) 15%.

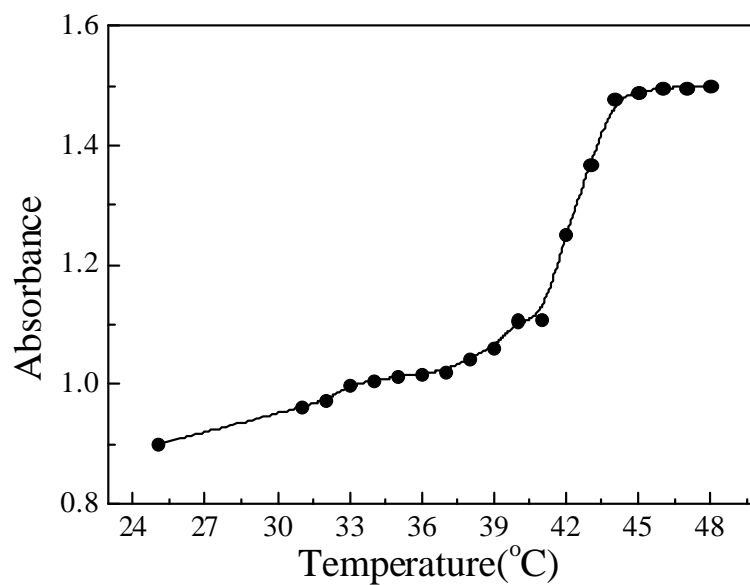

Figure S4 Relationship between the temperature and absorbance of the colloidosomes (1 mg/ml) in PBS (pH =7.4) solution. The Absorbance was recorded at 660 nm using a Shimadzu UV-1800 spectrofluorometer.
